# Supplementary material for: Conditions for metachronal coordination in arrays of model cilia
Source: PubMed Central journal article supplement — Proc Natl Acad Sci U S A. 2021 Aug 6;118(32):e2102828118. doi: 10.1073/pnas.2102828118 (PMC8364176; doi:10.1073/pnas.2102828118), 2021-08-06
Supplement: pnas.2102828118.sapp.pdf [file pnas.2102828118.sapp.pdf]

1

## 2 **Supplementary Information for**

### 3 **Designing metachronal waves of cilia**

4 **Fanlong Meng, Rachel R. Bennett, Nariya Uchida and Ramin Golestanian**

5 **Ramin Golestanian.**

6 **E-mail: [ramin.golestaniands.mpg.de](mailto:ramin.golestaniands.mpg.de)**

#### 7 **This PDF file includes:**

8     Supplementary text

9     Fig. S1

10    Legends for Movies S1 to S12

11    SI References

#### 12 **Other supplementary materials for this manuscript include the following:**

13    Movies S1 to S12

14 **Supporting Information Text**

15 **1. Blake tensor in 2D Fourier space**

16 Blake tensor  $G(\mathbf{R}'; \mathbf{R})$  in the real space is (1)

$$17 \quad G_{ij} = \frac{1}{8\pi\eta} \left\{ \frac{\delta_{ij}}{d} + \frac{d_i d_j}{d^3} - \frac{\delta_{ij}}{\bar{d}} - \frac{\bar{d}_i \bar{d}_j}{\bar{d}^3} + 2z(\delta_{j\alpha} \delta_{\alpha\xi} - \delta_{j3} \delta_{3\xi}) \frac{\partial}{\partial \bar{d}_\xi} \left[ \frac{z \bar{d}_i}{\bar{d}^3} - \left( \frac{\delta_{i3}}{\bar{d}} + \frac{\bar{d}_i \bar{d}_3}{\bar{d}^3} \right) \right] \right\}, \quad [1]$$

18 with  $\mathbf{d} = \mathbf{R}' - \mathbf{R}$ ,  $\bar{\mathbf{d}} = \bar{\mathbf{R}}' - \mathbf{R}$  and Greek letters denoting for the directions in 3D space. The projected positions of  $\mathbf{R}$  and  $\mathbf{R}'$   
19 onto the  $xy$  plane are denoted as  $\mathbf{R}_p = (x, y)$  and  $\mathbf{R}'_p = (x', y')$ , respectively.

20 Blake tensor can be expressed in the 2D Fourier space  $\mathbf{q} = (q_x, q_y)$ . We take  $G_{\alpha\beta}$  components as an example, where  
21  $\alpha, \beta = x, y$ . Explicitly,  $G_{\alpha\beta}$  in the real space is:

$$22 \quad G_{\alpha\beta} = \frac{1}{8\pi\eta} \left\{ \underbrace{\left( \frac{\delta_{\alpha\beta}}{d} + \frac{d_\alpha d_\beta}{d^3} \right)}_{\langle 1 \rangle} - \underbrace{\left( \frac{\delta_{\alpha\beta}}{\bar{d}} + \frac{\bar{d}_\alpha \bar{d}_\beta}{\bar{d}^3} \right)}_{\langle 2 \rangle} + \underbrace{2zz' \frac{\partial^2}{\partial \bar{d}_\alpha \partial \bar{d}_\beta} \frac{1}{\bar{d}}}_{\langle 3 \rangle} \right\}, \quad [2]$$

$$23 \quad \text{by recalling } \bar{d}_3 = z + z', \quad \text{and } \frac{\bar{d}_\alpha}{\bar{d}^3} = -\frac{\partial}{\partial \bar{d}_\alpha} \frac{1}{\bar{d}}. \quad [3]$$

24 We now use a Fourier representation as follows:

$$25 \quad \langle 1 \rangle = \frac{1}{\pi^2} \int d^2 q d q_z e^{i\mathbf{q} \cdot (\mathbf{R}'_p - \mathbf{R}_p)} e^{i q_z \cdot (z' - z)} \left[ \frac{\delta_{\alpha\beta}}{q^2 + q_z^2} - \frac{q_\alpha q_\beta}{(q^2 + q_z^2)^2} \right] \\ 26 \quad = \frac{1}{\pi} \left\{ \int d^2 q e^{i\mathbf{q} \cdot (\mathbf{R}'_p - \mathbf{R}_p)} \left[ \frac{\delta_{\alpha\beta}}{|\mathbf{q}|} e^{-|\mathbf{q}| |z' - z|} - q_\alpha q_\beta \frac{|z' - z| |\mathbf{q}| + 1}{2|\mathbf{q}|^3} e^{-|\mathbf{q}| |z' - z|} \right] \right\}, \quad [4]$$

27 where  $q^2 = q_x^2 + q_y^2$ . Similarly, we can have

$$28 \quad \langle 2 \rangle = \frac{1}{\pi^2} \int d^2 q d q_z e^{i\mathbf{q} \cdot (\mathbf{R}'_p - \mathbf{R}_p)} e^{i q_z \cdot (z' + z)} \left[ \frac{\delta_{\alpha\beta}}{q^2 + q_z^2} - \frac{q_\alpha q_\beta}{(q^2 + q_z^2)^2} \right] \\ 29 \quad = \frac{1}{\pi} \left\{ \int d^2 q e^{i\mathbf{q} \cdot (\mathbf{R}'_p - \mathbf{R}_p)} \left[ \frac{\delta_{\alpha\beta}}{|\mathbf{q}|} e^{-|\mathbf{q}| (z' + z)} - q_\alpha q_\beta \frac{(z' + z) |\mathbf{q}| + 1}{2|\mathbf{q}|^3} e^{-|\mathbf{q}| (z' + z)} \right] \right\}, \quad [5]$$

30 and

$$31 \quad \langle 3 \rangle = -2zz' q_\alpha q_\beta \frac{1}{8\pi^3} \int d^2 q d q_z e^{i\mathbf{q} \cdot (\mathbf{R}'_p - \mathbf{R}_p)} e^{i q_z \cdot (z' - z)} \frac{4\pi}{q^2 + q_z^2} = -\frac{zz'}{\pi} q_\alpha q_\beta \int d^2 q e^{i\mathbf{q} \cdot (\mathbf{R}'_p - \mathbf{R}_p)} \frac{1}{|\mathbf{q}|} e^{-|\mathbf{q}| (z' + z)}. \quad [6]$$

32 Then, the  $\alpha, \beta$  components of the Blake tensor can be expressed as

$$33 \quad G_{\alpha\beta} = \frac{1}{16\pi^2 \eta} \int d^2 q \frac{1}{|\mathbf{q}|} e^{i\mathbf{q} \cdot (\mathbf{R}'_p - \mathbf{R}_p)} \left\{ \left( 2\delta_{\alpha\beta} - \frac{q_\alpha q_\beta}{|\mathbf{q}|^2} \right) \left[ e^{-|\mathbf{q}| |z' - z|} - e^{-|\mathbf{q}| (z' + z)} \right] - \right. \\ 34 \quad \left. \frac{q_\alpha q_\beta}{|\mathbf{q}|} \left[ (|z' - z| e^{-|\mathbf{q}| |z' - z|} - (z' + z) e^{-|\mathbf{q}| (z' + z)}) - 2zz' q_\alpha q_\beta e^{-|\mathbf{q}| (z' + z)} \right] \right\} \quad (\alpha, \beta = x, y). \quad [7]$$

35 By repeating similar calculations, the other components can be represented in Fourier space as follows:

$$36 \quad G_{\alpha z} = \frac{1}{16\pi^2 \eta} \int d^2 q \frac{1}{|\mathbf{q}|} e^{i\mathbf{q} \cdot (\mathbf{R}'_p - \mathbf{R}_p)} i q_\alpha \left[ -(z' - z) e^{-|\mathbf{q}| |z' - z|} + (z' - z) e^{-|\mathbf{q}| (z' + z)} + 2zz' |\mathbf{q}| e^{-|\mathbf{q}| (z' + z)} \right], \quad [8]$$

$$37 \quad G_{z\alpha} = \frac{1}{16\pi^2 \eta} \int d^2 q \frac{1}{|\mathbf{q}|} e^{i\mathbf{q} \cdot (\mathbf{R}'_p - \mathbf{R}_p)} i q_\alpha \left[ -(z' - z) e^{-|\mathbf{q}| |z' - z|} + (z' - z) e^{-|\mathbf{q}| (z' + z)} - 2zz' |\mathbf{q}| e^{-|\mathbf{q}| (z' + z)} \right], \quad [9]$$

$$38 \quad G_{zz} = \frac{1}{16\pi^2 \eta} \int d^2 q \frac{1}{|\mathbf{q}|} e^{i\mathbf{q} \cdot (\mathbf{R}'_p - \mathbf{R}_p)} \left[ e^{-|\mathbf{q}| |z' - z|} - e^{-|\mathbf{q}| (z' + z)} + |\mathbf{q}| |z' - z| e^{-|\mathbf{q}| |z' - z|} \right. \\ 39 \quad \left. - |\mathbf{q}| (z' + z) e^{-|\mathbf{q}| (z' + z)} - 2zz' |\mathbf{q}|^2 e^{-|\mathbf{q}| (z' + z)} \right]. \quad [10]$$

## 40 2. Tilting trajectories – dynamic equation, dispersion relation and stability condition

41 **A. Dynamic equation.** As discussed in the main text, the cilia trajectories are tilted at an angle  $\chi$  to the  $z$  direction,  
 42 making an angle  $\theta$  to the  $x$  direction ( $\theta = \pi/2$  and  $\chi = 0$  for trajectories in the  $yz$  plane). The position of the bead is:  
 43  $\mathbf{R} - \mathbf{r} = a(\cos \phi \cos \theta + \sin \chi \sin \phi \sin \theta, \cos \phi \sin \theta - \sin \chi \sin \phi \cos \theta, \cos \chi \sin \phi)$  with  $\mathbf{r}$  as lattice coordinates, and the tangential  
 44 direction along the trajectory is:  $\mathbf{t} = (-\cos \theta \sin \phi + \sin \chi \sin \theta \cos \phi, -\sin \theta \sin \phi - \sin \chi \cos \theta \cos \phi, \cos \chi \cos \phi)$ . Here we introduce  
 45 two unit vectors for simple notations,  $\mathbf{b} = (-\sin \theta, \cos \theta, 0)$  and  $\mathbf{c} = (\cos \theta, \sin \theta, 0)$ , and the The unit vector in the normal  
 46 direction of the rotation plane is  $\mathbf{n} = -\cos \chi \mathbf{b} - \sin \chi \mathbf{e}_z$ .

47 Since the near field effect arising from the trajectory size has been ignored, the resolution for the height difference between  
 48 cilia is about the trajectory size, i.e.,  $|z' - z| \sim 2a$ , which naturally sets a cutoff for applicable wave length. With Blake tensor  
 49 in the 2D Fourier space, the dynamic equation of the cilia can be re-written as:

$$\begin{aligned}
 50 \quad \dot{\phi} &\simeq \frac{f(\phi)}{\zeta(\phi)a} + \sum_{\mathbf{r}'} \frac{f(\phi')}{16\pi^2\eta a} \int d^2q \frac{1}{|\mathbf{q}|} e^{i\mathbf{q}\cdot(\mathbf{r}-\mathbf{r}')} \times \\
 51 &\left\{ \left[ (e^{-2|\mathbf{q}|a} - e^{-2|\mathbf{q}|h}) \left( 2 - \frac{q_x^2}{|\mathbf{q}|^2} \right) + 2h \frac{q_x^2}{|\mathbf{q}|} e^{-2|\mathbf{q}|h} - 2h^2 q_x^2 e^{-2|\mathbf{q}|h} \right] \times \right. \\
 52 &(-\cos \theta \sin \phi + \sin \chi \sin \theta \cos \phi)(-\cos \theta \sin \phi' + \sin \chi \sin \theta \cos \phi') - \\
 53 &\frac{q_x q_y}{|\mathbf{q}|^2} (e^{-2|\mathbf{q}|a} - e^{-2|\mathbf{q}|h} - 2h|\mathbf{q}|e^{-2|\mathbf{q}|h} + 2h^2|\mathbf{q}|^2 e^{-2|\mathbf{q}|h}) (\cos \theta \sin \phi - \sin \chi \sin \theta \cos \phi)(\sin \theta \sin \phi' + \sin \chi \cos \theta \cos \phi') - \\
 54 &\frac{q_x q_y}{|\mathbf{q}|^2} (e^{-2|\mathbf{q}|a} - e^{-2|\mathbf{q}|h} - 2h|\mathbf{q}|e^{-2|\mathbf{q}|h} + 2h^2|\mathbf{q}|^2 e^{-2|\mathbf{q}|h}) (\cos \theta \sin \phi' - \sin \chi \sin \theta \cos \phi')(\sin \theta \sin \phi + \sin \chi \cos \theta \cos \phi) + \\
 55 &\left[ (e^{-2|\mathbf{q}|a} - e^{-2|\mathbf{q}|h}) \left( 2 - \frac{q_y^2}{|\mathbf{q}|^2} \right) + 2h \frac{q_y^2}{|\mathbf{q}|} e^{-2|\mathbf{q}|h} - 2h^2 q_y^2 e^{-2|\mathbf{q}|h} \right] \times \\
 56 &(\sin \theta \sin \phi + \sin \chi \cos \theta \cos \phi)(\sin \theta \sin \phi' + \sin \chi \cos \theta \cos \phi') - \\
 57 &i2q_x |\mathbf{q}| h^2 e^{-2|\mathbf{q}|h} (\cos \theta \sin \phi - \sin \chi \sin \theta \cos \phi) \cos \chi \cos \phi' - \\
 58 &i2q_y |\mathbf{q}| h^2 e^{-2|\mathbf{q}|h} (\sin \theta \sin \phi' + \sin \chi \cos \theta \cos \phi') \cos \chi \cos \phi' + \\
 59 &i2q_x |\mathbf{q}| h^2 e^{-2|\mathbf{q}|h} (\cos \theta \sin \phi' - \sin \chi \sin \theta \cos \phi') \cos \chi \cos \phi + \\
 60 &i2q_y |\mathbf{q}| h^2 e^{-2|\mathbf{q}|h} (\sin \theta \sin \phi' + \sin \chi \cos \theta \cos \phi') \cos \chi \cos \phi + \\
 61 &\left. \left[ (e^{-2|\mathbf{q}|a} - e^{-2|\mathbf{q}|h} - 2h|\mathbf{q}|e^{-2|\mathbf{q}|h} - 2h^2|\mathbf{q}|^2 e^{-2|\mathbf{q}|h}) \cos^2 \chi \cos \phi \cos \phi' \right] \right\}. \tag{11}
 \end{aligned}$$

62 **B. Separation of timescales.** In the system, the phase difference between cilia  $\phi - \phi'$  is a slow variable, compared with the  
 63 sum of the two phases  $\phi + \phi'$ . The dynamical equation Eq. (11) can be re-expressed in terms  $\phi - \phi'$  and  $\phi + \phi'$ , then we can  
 64 time-average the fast variable over a beat period of the cilia to obtain the dynamical equation expressed in the slow variable.

65 Equation (7) in the main text gives us the dynamical equation for the new coordinate,  $\partial_t \bar{\phi} = \dot{\phi} \Omega_0 a \zeta(\phi) / f(\phi)$ , and we  
 66 substitute Eq. (11) in for  $\dot{\phi}$ . This gives us  $\zeta(\phi) f(\phi') / f(\phi)$  multiplied by a linear combination of  $\sin \phi \sin \phi'$ ,  $\sin \phi \cos \phi'$ ,  
 67  $\cos \phi \sin \phi'$  and  $\cos \phi \cos \phi'$ , with different coefficients. We will use the term  $\zeta(\phi) \frac{f(\phi')}{f(\phi)} \sin \phi \sin \phi'$  as an example to show how we  
 68 can approximate the dynamical equation, Eq. (11), in terms of only the slow variable, using the following steps:

$$\begin{aligned}
 69 \quad F_{\text{e.g.}} &:= \zeta(\phi) \frac{f(\phi')}{f(\phi)} \sin \phi \sin \phi' \\
 70 &= \left( 1 + \sum_{n=1} C_n \cos n\phi + D_n \sin n\phi \right) \left( 1 + \sum_{n=1} A_n \cos n\phi' + B_n \sin n\phi' \right) \left( 1 - \sum_{n=1} A_n \cos n\phi + B_n \sin n\phi \right) \sin \phi \sin \phi' \tag{12}
 \end{aligned}$$

71 Expanding this up to first order in the harmonics we have

$$72 \quad F_{\text{e.g.}} = \left\{ 1 + \sum_{n=1} [(C_n - A_n) \cos n\phi + (D_n - B_n) \sin n\phi + A_n \cos n\phi' + B_n \sin n\phi'] \right\} \frac{1}{2} [\cos(\phi - \phi') - \cos(\phi + \phi')] \tag{13}$$

73 Now we express this in the new coordinate, defined by Eq. (8) in the main text:

$$\begin{aligned}
F_{\text{e.g.}} = & \left\{ 1 + \sum_{n=1} \left[ (C_n - A_n) \cos \left( n\bar{\phi} + n \sum_{m=1} \left( \frac{A_m - C_m}{m} \sin m\bar{\phi} - \frac{B_m - D_m}{m} \cos m\bar{\phi} \right) \right. \right. \\
& + (D_n - B_n) \sin \left( n\bar{\phi} + n \sum_{m=1} \left( \frac{A_m - C_m}{m} \sin m\bar{\phi} - \frac{B_m - D_m}{m} \cos m\bar{\phi} \right) \right. \\
& + A_n \cos \left( n\bar{\phi}' + n \sum_{m=1} \left( \frac{A_m - C_m}{m} \sin m\bar{\phi}' - \frac{B_m - D_m}{m} \cos m\bar{\phi}' \right) \right. \\
& \left. \left. + B_n \sin \left( n\bar{\phi}' + n \sum_{m=1} \left( \frac{A_m - C_m}{m} \sin m\bar{\phi}' - \frac{B_m - D_m}{m} \cos m\bar{\phi}' \right) \right) \right] \right\} \quad [14] \\
& \times \frac{1}{2} \left[ \cos \left( \bar{\phi} - \bar{\phi}' + \sum_{m=1} \left( \frac{A_m - C_m}{m} (\sin m\bar{\phi} - \sin m\bar{\phi}') - \frac{B_m - D_m}{m} (\cos m\bar{\phi} - \cos m\bar{\phi}') \right) \right) \right. \\
& \left. - \cos \left( \bar{\phi} + \bar{\phi}' + \sum_{m=1} \left( \frac{A_m - C_m}{m} (\sin m\bar{\phi} + \sin m\bar{\phi}') - \frac{B_m - D_m}{m} (\cos m\bar{\phi} + \cos m\bar{\phi}') \right) \right) \right]
\end{aligned}$$

75 Expand out the harmonic terms from the trig functions to first order, using

$$76 \quad \cos \left( \bar{\phi} + \sum \text{harmonics} \right) = \cos \bar{\phi} (1 + O(\sum \text{harmonics})^2) - \sin \bar{\phi} (\sum \text{harmonics} + O(\sum \text{harmonics})^3), \quad [15]$$

$$77 \quad \sin \left( \bar{\phi} + \sum \text{harmonics} \right) = \sin \bar{\phi} (1 + O(\sum \text{harmonics})^2) + \cos \bar{\phi} (\sum \text{harmonics} + O(\sum \text{harmonics})^3). \quad [16]$$

78 This gives us (to first order in the harmonics)

$$\begin{aligned}
F_{\text{e.g.}} = & \left\{ 1 + \sum_{n=1} \left[ (C_n - A_n) \cos (n\bar{\phi}) + (D_n - B_n) \sin (n\bar{\phi}) + A_n \cos (n\bar{\phi}') + B_n \sin (n\bar{\phi}') \right] \right\} \frac{1}{2} \left[ \cos (\bar{\phi} - \bar{\phi}') - \cos (\bar{\phi} + \bar{\phi}') \right] \\
& - \frac{1}{2} \left[ \sin (\bar{\phi} - \bar{\phi}') \sum_{m=1} \left( \frac{A_m - C_m}{m} (\sin m\bar{\phi} - \sin m\bar{\phi}') - \frac{B_m - D_m}{m} (\cos m\bar{\phi} - \cos m\bar{\phi}') \right) \right. \\
& \left. - \sin (\bar{\phi} + \bar{\phi}') \sum_{m=1} \left( \frac{A_m - C_m}{m} (\sin m\bar{\phi} + \sin m\bar{\phi}') - \frac{B_m - D_m}{m} (\cos m\bar{\phi} + \cos m\bar{\phi}') \right) \right] \quad [17]
\end{aligned}$$

80 We now rewrite the equation in terms of phase differences and sum of phases:

$$81 \quad \Delta = \bar{\phi} - \bar{\phi}', \quad \varphi = \bar{\phi} + \bar{\phi}', \quad \bar{\phi} = \frac{\varphi + \Delta}{2}, \quad \bar{\phi}' = \frac{\varphi - \Delta}{2}. \quad [18]$$

82 Now we have

$$\begin{aligned}
F_{\text{e.g.}} = & \left\{ 1 + \sum_{n=1} \left[ (C_n - A_n) \cos \left( \frac{n}{2}(\varphi + \Delta) \right) + (D_n - B_n) \sin \left( \frac{n}{2}(\varphi + \Delta) \right) + A_n \cos \left( \frac{n}{2}(\varphi - \Delta) \right) \right. \right. \\
& \left. \left. + B_n \sin \left( \frac{n}{2}(\varphi - \Delta) \right) \right] \right\} \frac{1}{2} \left[ \cos (\Delta) - \cos (\varphi) \right] \\
& - \frac{1}{2} \left[ \sin (\Delta) \sum_{m=1} \left( \frac{A_m - C_m}{m} 2 \cos \left( \frac{m\varphi}{2} \right) \sin \left( \frac{m\Delta}{2} \right) + \frac{B_m - D_m}{m} 2 \sin \left( \frac{m\varphi}{2} \right) \sin \left( \frac{m\Delta}{2} \right) \right) \right. \\
& \left. - \sin (\varphi) \sum_{m=1} \left( \frac{A_m - C_m}{m} 2 \sin \left( \frac{m\varphi}{2} \right) \cos \left( \frac{m\Delta}{2} \right) - \frac{B_m - D_m}{m} 2 \cos \left( \frac{m\varphi}{2} \right) \cos \left( \frac{m\Delta}{2} \right) \right) \right]. \quad [19]
\end{aligned}$$

84 Expand out the trig functions with argument  $\varphi \pm \Delta$ :

$$\begin{aligned}
F_{\text{e.g.}} = & \left\{ 1 + \sum_{n=1} \left[ (C_n - A_n) \left( \cos\left(\frac{n\varphi}{2}\right) \cos\left(\frac{n\Delta}{2}\right) - \sin\left(\frac{n\varphi}{2}\right) \sin\left(\frac{n\Delta}{2}\right) \right) \right. \right. \\
& + (D_n - B_n) \left( \sin\left(\frac{n\varphi}{2}\right) \cos\left(\frac{n\Delta}{2}\right) + \cos\left(\frac{n\varphi}{2}\right) \sin\left(\frac{n\Delta}{2}\right) \right) + A_n \left( \cos\left(\frac{n\varphi}{2}\right) \cos\left(\frac{n\Delta}{2}\right) + \sin\left(\frac{n\varphi}{2}\right) \sin\left(\frac{n\Delta}{2}\right) \right) \\
& \left. \left. + B_n \left( \sin\left(\frac{n\varphi}{2}\right) \cos\left(\frac{n\Delta}{2}\right) - \cos\left(\frac{n\varphi}{2}\right) \sin\left(\frac{n\Delta}{2}\right) \right) \right] \right\} \frac{1}{2} \left[ \cos(\Delta) - \cos(\varphi) \right] \\
& - \frac{1}{2} \left[ \sin(\Delta) \sum_{m=1} \left( \frac{A_m - C_m}{m} 2 \cos\left(\frac{m\varphi}{2}\right) \sin\left(\frac{m\Delta}{2}\right) + \frac{B_m - D_m}{m} 2 \sin\left(\frac{m\varphi}{2}\right) \sin\left(\frac{m\Delta}{2}\right) \right) \right. \\
& \left. - \sin(\varphi) \sum_{m=1} \left( \frac{A_m - C_m}{m} 2 \sin\left(\frac{m\varphi}{2}\right) \cos\left(\frac{m\Delta}{2}\right) - \frac{B_m - D_m}{m} 2 \cos\left(\frac{m\varphi}{2}\right) \cos\left(\frac{m\Delta}{2}\right) \right) \right].
\end{aligned} \tag{20}$$

86 We now use separation of timescales.  $\varphi$  is fast compared to  $\Delta$ , so we time average  $\varphi$  terms over a beat cycle, while holding  $\Delta$   
87 terms constant. The time average is obtained by integrating over a beat cycle:

$$\begin{aligned}
\langle F_{\text{e.g.}} \rangle &= \frac{1}{T} \int_0^T dt F_{\text{e.g.}}(\varphi(t)), \\
&= \frac{1}{T} \int_0^{4\pi} \frac{d\varphi}{2\Omega_0} F_{\text{e.g.}}(\varphi)
\end{aligned} \tag{21}$$

90 where

$$T = \frac{2\pi}{\Omega_0}, \tag{22}$$

92 and we have made use of the constant intrinsic velocity in the new coordinate system. When we do the time average, many of  
93 the terms in Eq. (20) average to zero. Only terms with  $\cos^2(n\varphi)$  or  $\sin^2(n\varphi)$  survive. Time averaging leaves the following  
94 terms:

$$\begin{aligned}
\langle F_{\text{e.g.}} \rangle &= \frac{1}{2} \left\{ \cos \Delta - \left( \frac{C_2 - A_2}{2} \cos \Delta + \frac{D_2 - B_2}{2} \sin \Delta + \frac{A_2}{2} \cos \Delta - \frac{B_2}{2} \sin \Delta \right) + \frac{(A_2 - C_2)}{2} \cos \Delta \right\} \\
&= \frac{1}{2} \left[ 1 + \frac{A_2}{2} - C_2 \right] \cos \Delta + \frac{1}{2} \left[ B_2 - \frac{D_2}{2} \right] \sin \Delta + O(\text{harmonics})^2.
\end{aligned} \tag{23}$$

97 Then the dynamic equation Eq. (11) can be re-expressed as:

$$\partial_t \bar{\phi}(\mathbf{r}, t) = \Omega_0 + \frac{\Omega_0 h b}{16\pi} \sum_{\mathbf{r}'} \int d^2 \mathbf{q} e^{i\mathbf{q} \cdot (\mathbf{r} - \mathbf{r}')} \left[ \mathcal{M}(\mathbf{q}) \cos(\bar{\phi}(\mathbf{r}) - \bar{\phi}(\mathbf{r}')) + \mathcal{S}(\mathbf{q}) \sin(\bar{\phi}(\mathbf{r}) - \bar{\phi}(\mathbf{r}')) \right],$$

99 where

$$\mathcal{M} = g_0(\mathbf{q}h) + g_1(\mathbf{q}h)(A_2 - 2C_2) + g_2(\mathbf{q}h)(B_2 - 2D_2), \quad \mathcal{S} = g_1(\mathbf{q}h)(2B_2 - D_2) - g_2(\mathbf{q}h)(2A_2 - C_2), \tag{24}$$

101 with

$$\begin{cases} g_0(\mathbf{p}) = 2p^{-1}(e^{-2p(a/h)} - e^{-2p})[3 - \cos^2 \chi(\hat{\mathbf{p}} \cdot \mathbf{c})^2] + 4(1-p)e^{-2p}[1 - \cos^2 \chi(\hat{\mathbf{p}} \cdot \mathbf{b})^2] - 4(1+p)e^{-2p} \cos^2 \chi \\ g_1(\mathbf{p}) = p^{-1}(e^{-2p(a/h)} - e^{-2p})[(\hat{\mathbf{p}} \cdot \mathbf{b})^2 - \sin^2 \chi(\hat{\mathbf{p}} \cdot \mathbf{c})^2] + 2(1-p)e^{-2p}[(\hat{\mathbf{p}} \cdot \mathbf{c})^2 - \sin^2 \chi(\hat{\mathbf{p}} \cdot \mathbf{b})^2] + 2(1+p)e^{-2p} \cos^2 \chi \\ g_2(\mathbf{p}) = 2[p^{-1}(1 - e^{-2p}) - 2(1-p)e^{-2p}] \sin \chi(\hat{\mathbf{p}} \cdot \mathbf{b})(\hat{\mathbf{p}} \cdot \mathbf{c}) \end{cases} \tag{25}$$

103 and this gives Equation (3)(9) in the main text.

104 **C. Dispersion relation and stability condition.** By assuming the cilia are beating in the form of metachronal wave with the wave  
105 frequency  $\omega$  and the wave vector  $\mathbf{k}$ , i.e.,  $\bar{\phi} = \omega t - \mathbf{k} \cdot \mathbf{r} + \delta\bar{\phi}$ , then the phase difference between cilia will become,

$$\bar{\Delta} = \mathbf{k} \cdot (\mathbf{r}' - \mathbf{r}) + \delta\bar{\phi} - \delta\bar{\phi}'. \tag{26}$$

107  $\sin \bar{\Delta}$  and  $\cos \bar{\Delta}$  in Equation Eq. (11) can be approximated as,

$$\begin{aligned}
\sin \bar{\Delta} &\simeq \frac{e^{i\mathbf{k} \cdot (\mathbf{r}' - \mathbf{r})} - e^{-i\mathbf{k} \cdot (\mathbf{r}' - \mathbf{r})}}{2i} + \frac{e^{i\mathbf{k} \cdot (\mathbf{r}' - \mathbf{r})} + e^{-i\mathbf{k} \cdot (\mathbf{r}' - \mathbf{r})}}{2} (\delta\bar{\phi} - \delta\bar{\phi}'), \\
\cos \bar{\Delta} &\simeq \frac{e^{i\mathbf{k} \cdot (\mathbf{r}' - \mathbf{r})} + e^{-i\mathbf{k} \cdot (\mathbf{r}' - \mathbf{r})}}{2} + \frac{e^{i\mathbf{k} \cdot (\mathbf{r}' - \mathbf{r})} - e^{-i\mathbf{k} \cdot (\mathbf{r}' - \mathbf{r})}}{2} i(\delta\bar{\phi} - \delta\bar{\phi}').
\end{aligned} \tag{27}$$

110 By taking the above equations and the Fourier transformation in a discrete lattice:  $\sum_{\mathbf{r}'} e^{i\mathbf{q}\cdot(\mathbf{r}-\mathbf{r}')} = \sum_{\mathbf{G}} \frac{4\pi^2}{\ell^2} \delta^2(\mathbf{q} + \mathbf{G})$ , where  
 111  $\mathbf{G}$  denote the vectors of the reciprocal lattice, then the dynamic equation can be simply calculated as:

$$112 \quad \dot{\bar{\phi}} = \omega(\mathbf{k}) + \partial_t \delta \bar{\phi}. \quad [28]$$

113 where  $\omega(\mathbf{k})$  represents the dispersion relation of the system, and  $\partial_t \delta \bar{\phi}$  represents the evolution of the perturbation.

114

115

116 **Dispersion relation.** The explicit form of  $\omega(\mathbf{k})$  and  $\partial_t \delta \bar{\phi}$  is:

$$117 \quad \omega = \Omega_0 \left[ 1 + \frac{\pi}{4} \frac{hb}{\ell^2} \sum_{\mathbf{G}} \mathcal{M}(\mathbf{k} + \mathbf{G}) \right]. \quad [29]$$

118 **Evolution of  $\delta \bar{\phi}$ .** The explicit form of  $\partial_t \delta \bar{\phi}$  is:

$$119 \quad \partial_t \delta \bar{\phi}_{\mathbf{k}}(\mathbf{q}) = -\left( \Gamma(\mathbf{q}, \mathbf{k}) - \Gamma(\mathbf{0}, \mathbf{k}) \right) \delta \bar{\phi}_{\mathbf{k}}(\mathbf{q}), \quad [30]$$

$$120 \quad \text{with } \Gamma(\mathbf{q}, \mathbf{k}) = \frac{\pi b \Omega_0}{8 \ell^2} \sum_{\mathbf{G}} [\mathcal{S}(\mathbf{q} + \mathbf{k} - \mathbf{G}) + \mathcal{S}(\mathbf{q} - \mathbf{k} - \mathbf{G})],$$

121 respectively.

## 122 References

- 123 1. Blake JR (1971) A note on the image system for a stokeslet in a no-slip boundary. *Mathematical Proceedings of the*  
 124 *Cambridge Philosophical Society* 70(02):303.

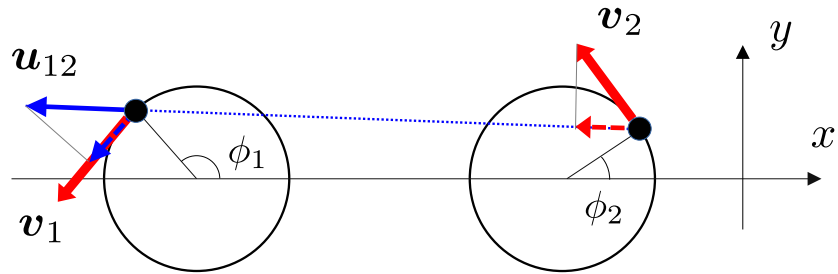

**Fig. S1.** Schematic picture of two interacting cilia making circular orbits in the  $xy$ -plane. Their velocities  $v_1$  and  $v_2$  are tangential to each orbit (red solid arrows). The motion of cilium #2 causes a flow along the line connecting the two cilia (blue dashed line), which is identical to a streamline and is almost parallel to the  $x$ -axis due to large distance. The fluid velocity  $u_{12}$  induced by the cilium #2 at the position of #1 (blue arrow) has the magnitude proportional to the projection of  $v_2$  onto the streamline ( $v_2 \sin \phi_2$ , red dashed arrow). The tangential component of  $u_{12}$  ( $u_{12} \sin \phi_1 \propto v_2 \sin \phi_2 \sin \phi_1$ , blue dashed line) adds to the velocity of cilium #1. Since  $v_2$  is proportional to the driving force  $f(\phi_2)$ , the velocity shift contains the factor  $\sin \phi_1 \sin \phi_2 f(\phi_2)$ .

- 125 **Movie S1.** Wave development of the cilia placed on a square lattice, with the tilting angles of the trajectory as  
126  $\theta = 0$  and  $\chi = 0$ .
- 127 **Movie S2.** Stable wave of the cilia placed on a square lattice, with the tilting angles of the trajectory as  $\theta = 0$   
128 and  $\chi = 0$ .
- 129 **Movie S3.** Wave development of the cilia placed on a square lattice, with the tilting angles of the trajectory as  
130  $\chi = 0$  and  $\theta = \pi/6$ .
- 131 **Movie S4.** Stable wave of the cilia placed on a square lattice, with the tilting angles of the trajectory as  $\chi = 0$   
132 and  $\theta = \pi/6$ .
- 133 **Movie S5.** Wave development of the cilia placed on a square lattice, with the tilting angles of the trajectory as  
134  $\chi = 0$  and  $\theta = \pi/4$ .
- 135 **Movie S6.** Stable wave of the cilia placed on a square lattice, with the tilting angles of the trajectory as  $\chi = 0$   
136 and  $\theta = \pi/4$ .
- 137 **Movie S7.** Wave development of the cilia placed on a square lattice, with the tilting angles of the trajectory as  
138  $\chi = \pi/36$  and  $\theta = \pi/4$ .
- 139 **Movie S8.** Stable wave of the cilia placed on a square lattice, with the tilting angles of the trajectory as  
140  $\chi = \pi/36$  and  $\theta = \pi/4$ .
- 141 **Movie S9.** Wave development of the cilia placed on a square lattice, with the tilting angles of the trajectory as  
142  $\chi = \pi/6$  and  $\theta = \pi/4$ .
- 143 **Movie S10.** Stable wave of the cilia placed on a square lattice, with the tilting angles of the trajectory as  
144  $\chi = \pi/6$  and  $\theta = \pi/4$ .
- 145 **Movie S11.** Wave development of the cilia placed on a triangular lattice, with the tilting angles of the trajectory  
146 as  $\theta = 0$  and  $\chi = 0$ .
- 147 **Movie S12.** Stable wave of the cilia placed on a triangular lattice, with the tilting angles of the trajectory as  
148  $\theta = 0$  and  $\chi = 0$ .
